# Supplementary material for: GPATCH11 variants cause mis-splicing and early-onset retinal dystrophy with neurological impairment
Source: Research Square preprint supplement (doi:10.21203/rs.3.rs-3423854/v1), 2023-10-27
Supplement: Supplementary file 1 [file 0eb8417dc3d23d408a5c0052.docx]

Data deposition:

RNASeq were available on BioStudies <https://www.ebi.ac.uk/biostudies/studies/S-BSST1157?key=e60e1e0a-d716-419c-9955-097a0d645d54>

The mass spectrometry proteomics data have been deposited to the ProteomeXchange Consortium via the PRIDE partner repository with the dataset identifier PXD041849, Reviewer account details:

Username: reviewer_pxd041849@ebi.ac.uk

Password: MQpy7OUA

Clinical Variants : https://submit.ncbi.nlm.nih.gov/subs/clinvar_org/SUB13720776/
